# Supplementary material for: Atomic layer deposition of vanadium oxide films for crystalline silicon solar cells
Source: Royal Society of Chemistry journal article supplement (doi:10.1039/d1ma00812a), 2021-10-12

### Supplementary information:

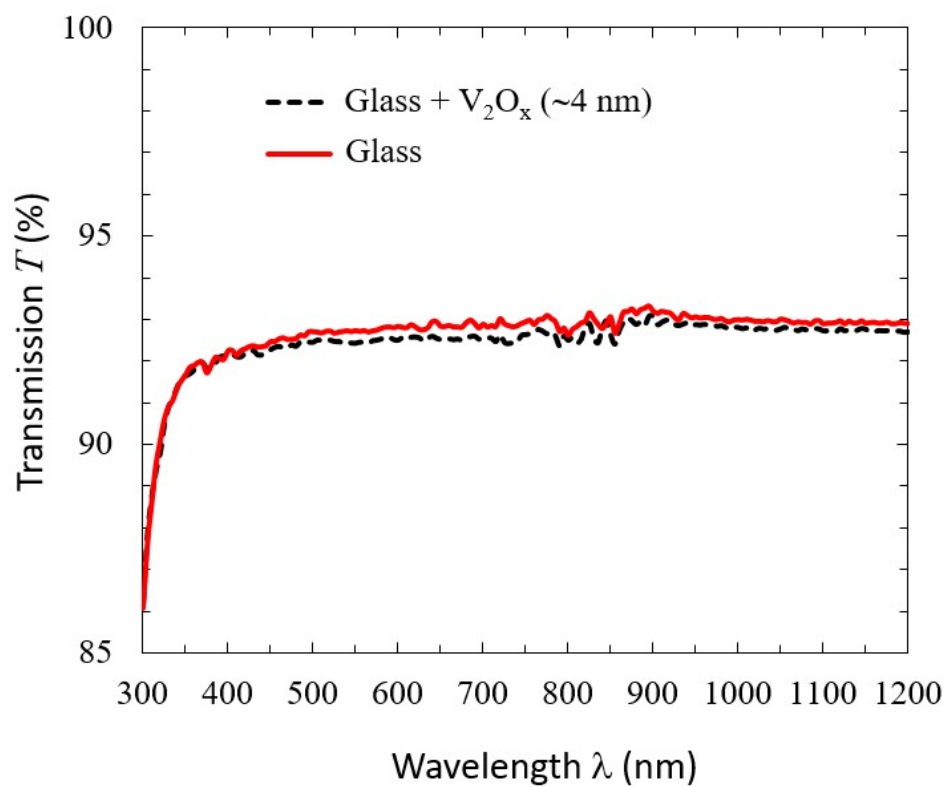

Supplement: d1ma00812a1.pdf [file d1ma00812a1.pdf]
